# Supplementary material
Source: publisher site journal article supplement (https://www.dovepress.com/article/530951)
Supplement: Supplementary file 1 [file 530951%20Revised%20Supplementary%20Figure%20S1-S6.docx]

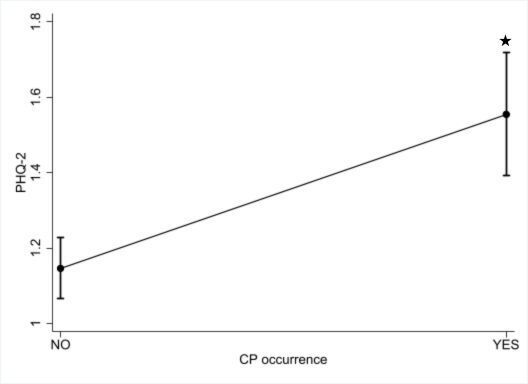


Supplementary Figure S1. Predictive margins of regression models of depression symptomatology on chronic pain occurrence.

Note:

CP, chronic pain; PHQ-2, 2-item patient health questionnaire

* Significant difference compared to base category (i.e., no chronic pain).


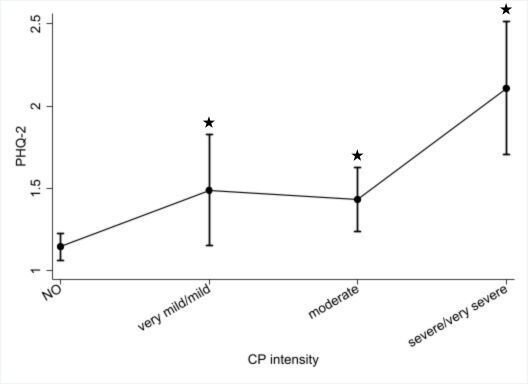


Supplementary Figure S2. Predictive margins of regression models of depression symptomatology on chronic pain intensity.

Note:

CP, chronic pain; PHQ-2, 2-item patient health questionnaire

* Significant difference compared to base category (i.e., no chronic pain).


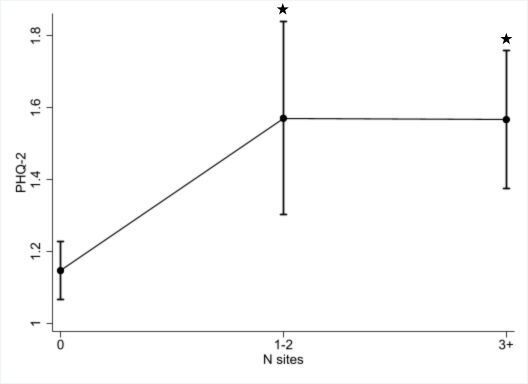


Supplementary Figure S3. Predictive margins of regression models of depression symptomatology on chronic pain body sites.

Note:

CP, chronic pain; PHQ-2, 2-item patient health questionnaire

* Significant difference compared to base category (i.e., no chronic pain).


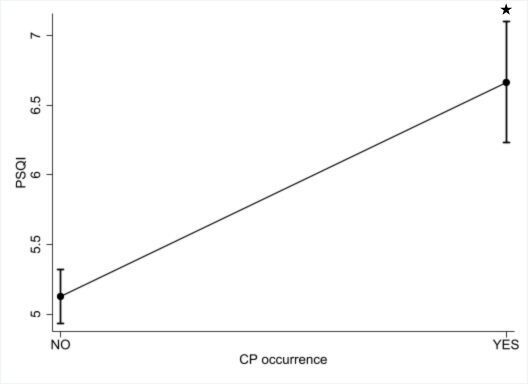


Supplementary Figure S4. Predictive margins of regression models of sleep quality on chronic pain occurrence.

Note:

CP, chronic pain; PSQI, Pittsburgh sleep quality index

* Significant difference compared to base category (i.e., no chronic pain).


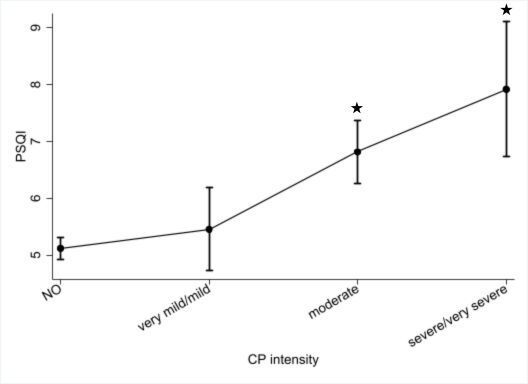


Supplementary Figure S5. Predictive margins of regression models of sleep quality on chronic pain intensity.

Note:

CP, chronic pain; PSQI, Pittsburgh sleep quality index

* Significant difference compared to base category (i.e., no chronic pain).


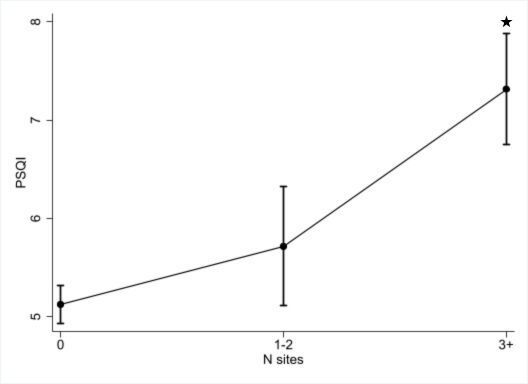


Supplementary Figure S6. Predictive margins of regression models of sleep quality on chronic pain body sites.

Note:

CP, chronic pain; PSQI, Pittsburgh sleep quality index

* Significant difference compared to base category (i.e., no chronic pain).
